# Supplementary material
Source: MDPI journal article supplement (https://www.mdpi.com/2073-4433/14/1/181)
Supplement: s1 [file s1]

## Supporting Information

# Direct Electrical Sensing of Iodine Gas by a Covalent Organic Frameworks-Based Sensor

Wanshuang Zhou <sup>1</sup>, Chun Kang <sup>1</sup>, Cong Yu <sup>1</sup>, Zhaojie Cui <sup>1</sup> and Xinbo Wang <sup>1,2,\*</sup>

<sup>1</sup> School of Environmental Science and Engineering, Shandong Key Laboratory of Environmental Processes and Health, Shandong University, No. 72 Binhai Road, Qingdao 266237, China

<sup>2</sup> Shenzhen Research Institute, Shandong University, Virtual University Park, Nanshan District, Shenzhen 518057, China

\* Correspondence: wangxb@sdu.edu.cn

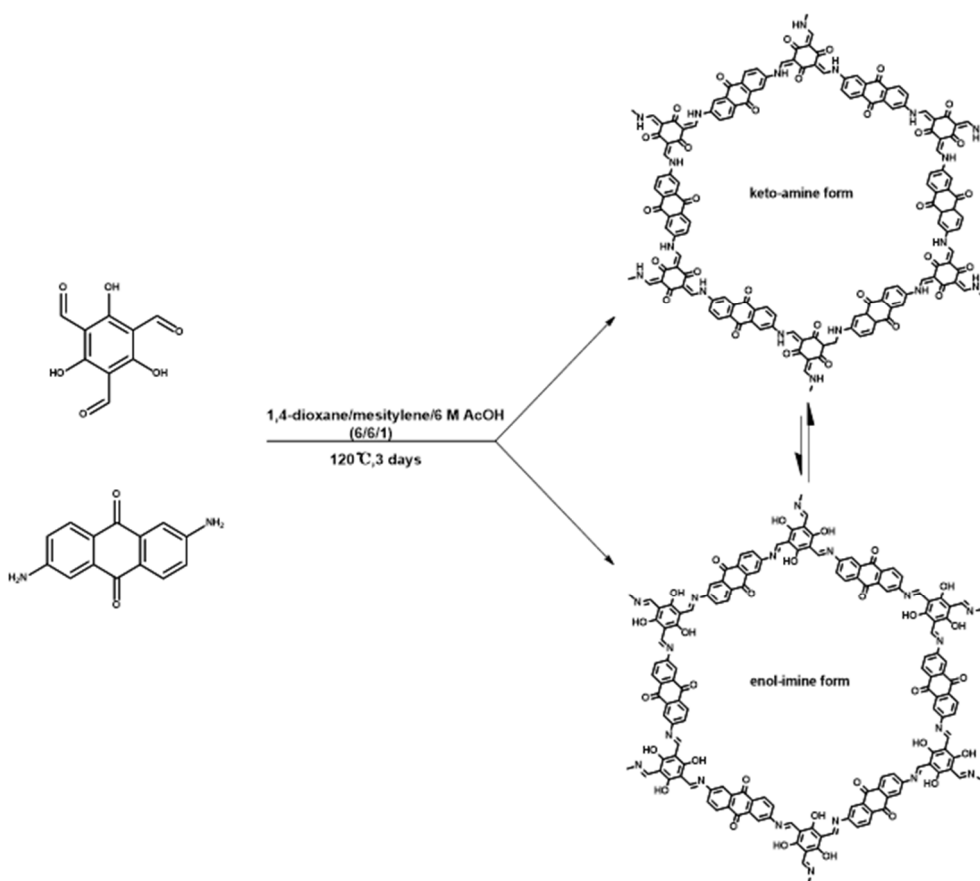

**Figure S1.** Synthesis of the AQ-COF.

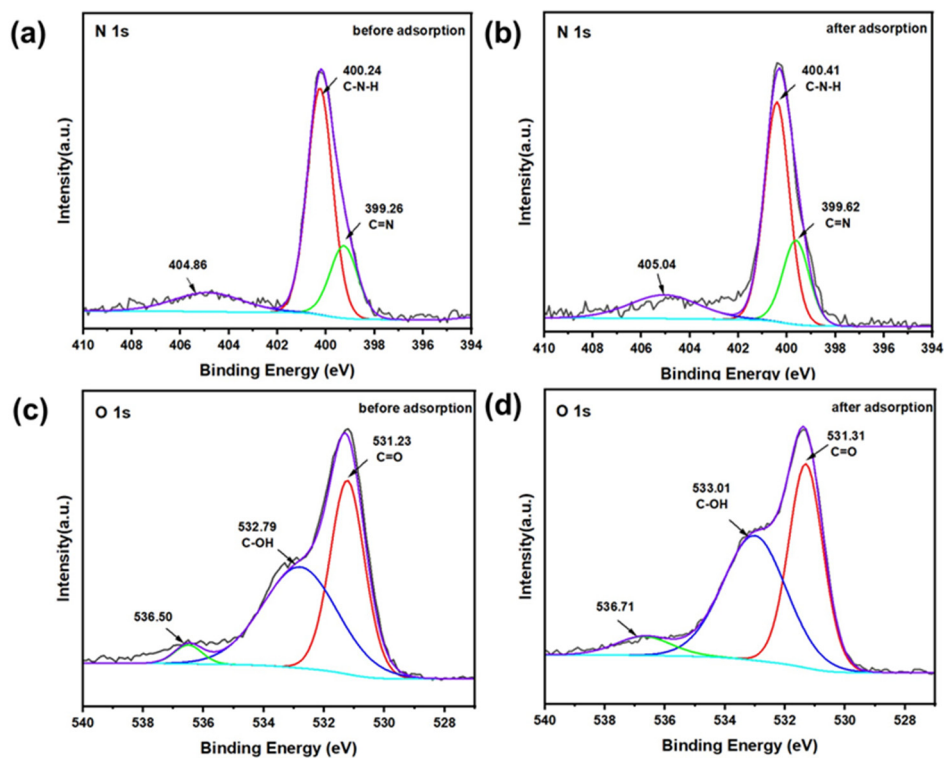

**Figure S2.** N1s (a,b) and O1s(c,d) spectra of AQ-COF before and after adsorption of iodine.

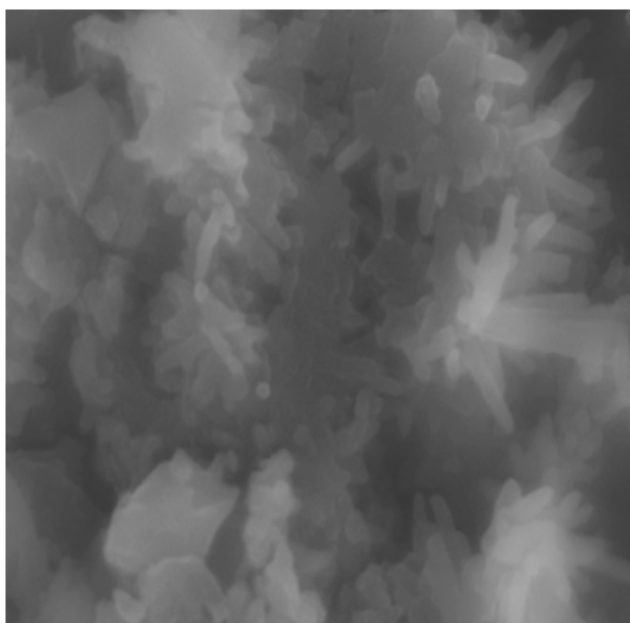

**Figure S3.** SEM image of AQ-COF.

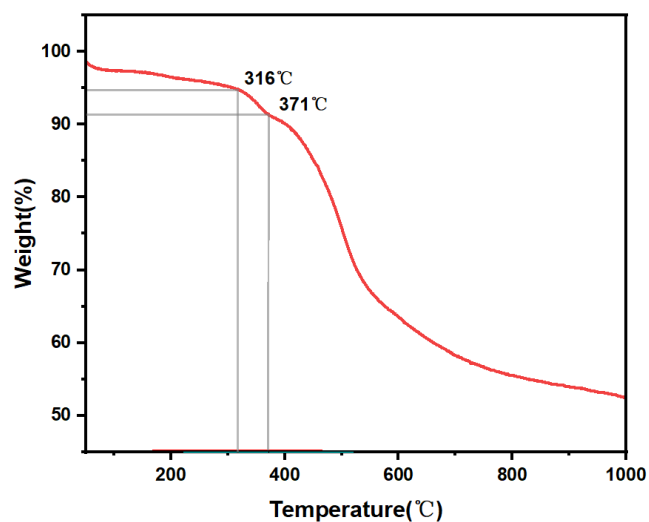

**Figure S4.** TG analysis of AQ-COF.

**Table S1.** Iodine adsorption and selectivity comparison of COF.

| Materials          | Temperature  | Time       | Iodine uptake                | Ref              |
|--------------------|--------------|------------|------------------------------|------------------|
| COF-PA             | 77 °C        | 16 h       | 4470 mg·g <sup>-1</sup>      | [27]             |
| HDADE              | 77 °C        | 60 h       | 5220 mg·g <sup>-1</sup>      | [38]             |
| TTA-FMTA-COF       | 77°C         | 24h        | 5070 mg·g <sup>-1</sup>      | [39]             |
| DbTd-COF           | 75 °C        | 24 h       | 4930 mg·g <sup>-1</sup>      | [40]             |
| hydrazide-MTH-TFPB | 75 °C        | 61 h       | 3050 mg·g <sup>-1</sup>      | [41]             |
| TGDM               | 150 °C       | 10 h       | 292 mg·g <sup>-1</sup>       | [42]             |
| <b>AQ-COF</b>      | <b>70 °C</b> | <b>6 h</b> | <b>470 mg·g<sup>-1</sup></b> | <b>This work</b> |

## References

(numbered as in the main file)

27. Zhao, Y.X.; Liu, X.; Li, Y.P.; Xia, M.; Xia, T.; Sun, H.C.; Sui, Z.Y.; Hu, X.M.; Chen, Q. Ultra-stable fluorescent 2D covalent organic framework for rapid adsorption and selective detection of radioiodine. *Microporous Mesoporous Mater.* **2021**, *319*, 6. <http://doi.org/10.1016/j.micromeso.2021.111046>.
38. Zhu, H.; Geng, T.M.; Tang, K.B. The cyclotriphosphazene-based covalent organic frameworks constructed entirely by flexible building blocks for adsorbing and fluorescence sensing iodine. *Microporous Mesoporous Mater.* **2022**, *343*, 10. <http://doi.org/10.1016/j.micromeso.2022.112165>.
39. Zhai, L.P.; Han, D.D.; Dong, J.H.; Jiang, W.Q.; Nie, R.M.; Yang, X.B.; Luo, X.L.; Li, Z.P. Constructing Stable and Porous Covalent Organic Frameworks for Efficient Iodine Vapor Capture. *Macromol. Rapid Commun.* **2021**, *42*, 7. <http://doi.org/10.1002/marc.202100032>.
40. Wu, Z.N.; Wei, W.; Ma, J.G.; Luo, J.Q.; Zhou, Y.M.; Zhou, Z.Y.; Liu, S.J. Adsorption of Iodine on Adamantane-Based Covalent Organic Frameworks. *ChemistrySelect* **2021**, *6*, 10141-10148. <http://doi.org/10.1002/slct.202102656>.
41. Yang, Y.-X.; Tang, X.-H.; Wu, J.-L.; Dong, Z.-Y.; Yan, Y.-L.; Zheng, S.-R.; Fan, J.; Li, X.; Cai, S.; Zhang, W.-G. Transformation of a Hydrazone-Linked Covalent Organic Framework into a Highly Stable Hydrazide-Linked One. *ACS Appl. Polym. Mater.* **2022**, *4*, 4624-4631. <http://doi.org/10.1021/acsapm.2c00543>.
42. Zhang, Z.; Dong, X.; Yin, J.; Li, Z.G.; Li, X.; Zhang, D.; Pan, T.; Lei, Q.; Liu, X.; Xie, Y.; et al. Chemically Stable Guanidinium Covalent Organic Framework for the Efficient Capture of Low-Concentration Iodine at High Temperatures. *J. Am. Chem. Soc.* **2022**, *144*, 6821-6829. <http://doi.org/10.1021/jacs.2c00563>.
